# Supplementary material
Source: Research Square preprint supplement (doi:10.21203/rs.3.rs-9283622/v1)
Supplement: Supplementary file 1 [file b8207be057c44a98c94ea4dc.docx]

Supplemental Digital Content

Figure S1 3

Table S1a-c 4

Table S2 5

# Figure S1

Flowchart of included patients

#
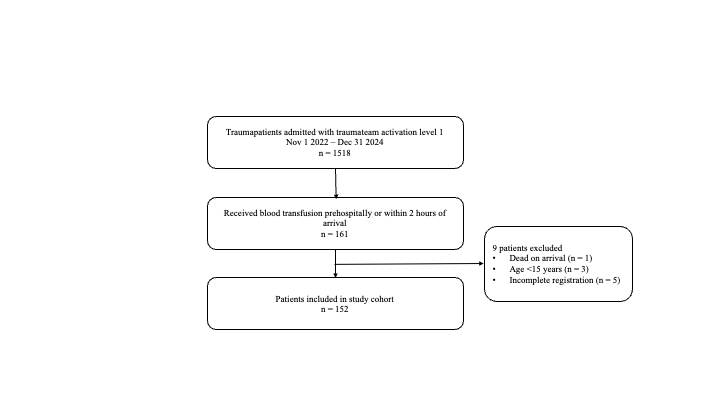


# Table S1a-c

Unadjusted and adjusted associations between prehospital blood transfusion and mortality presented as HR (95% CI).

**Table S1a. Association between prehospital blood transfusion and 24-hour mortality.**

|  | **HR (95% CI)** | **p-value** |
| --- | --- | --- |
| **Unadjusted** | 1.9 (0.9-4.4) | 0.12 |
| **Adjusted*** | 0.8 (0.3-2.4) | 0.71 |

HR, Hazard Ratio; CI, Confidence Interval

Table S1b. Association between prehospital blood transfusion and 30-day mortality.

|  | **HR (95% CI)** | **p-value** |
| --- | --- | --- |
| **Unadjusted** | 1.3 (0.7-2.6) | 0.43 |
| **Adjusted*** | 0.9 (0.4-0.2.2) | 0.84 |

HR, Hazard Ratio; CI, Confidence Interval

Table S1c. Association between prehospital blood transfusion and 90-day mortality.

|  | **HR (95% CI)** | **p-value** |
| --- | --- | --- |
| **Unadjusted** | 1.2 (0.6-2.4) | 0.54 |
| **Adjusted*** | 1.0 (0.4-2.3) | 0.995 |

HR, Hazard Ratio; CI, Confidence Interval

*Adjusted for age, sex, Injury Severity Score (ISS), prehospital transport time (scene departure to trauma unit arrival), first systolic blood pressure at trauma unit arrival.

# Table S2

Prehospital transfusion and massive transfusion risk: crude and adjusted estimates, presented as OR (95% CI).

|  | **OR (95% CI)** | **p-value** |
| --- | --- | --- |
| **Unadjusted** | 0.6 (0.3-1.1) | 0.015 |
| **Adjusted*** | 0.4 (0.2-0.8) | 0.015 |

OR, Odds Ratio; CI, Confidence Interval

*Adjusted for age, sex, Injury Severity Score (ISS), prehospital transport time (scene departure to trauma unit arrival), first systolic blood pressure at trauma unit arrival.
